# Supplementary material for: Does in utero HIV exposure and the early nutritional environment influence infant development and immune outcomes? Findings from a pilot study in Pretoria, South Africa
Source: PubMed Central journal article supplement (PMC7730756; doi:10.1186/s40814-020-00725-8), 2020-12-11
Supplement: 40814_2020_725_MOESM4_ESM.pdf [file 40814_2020_725_MOESM4_ESM.pdf]

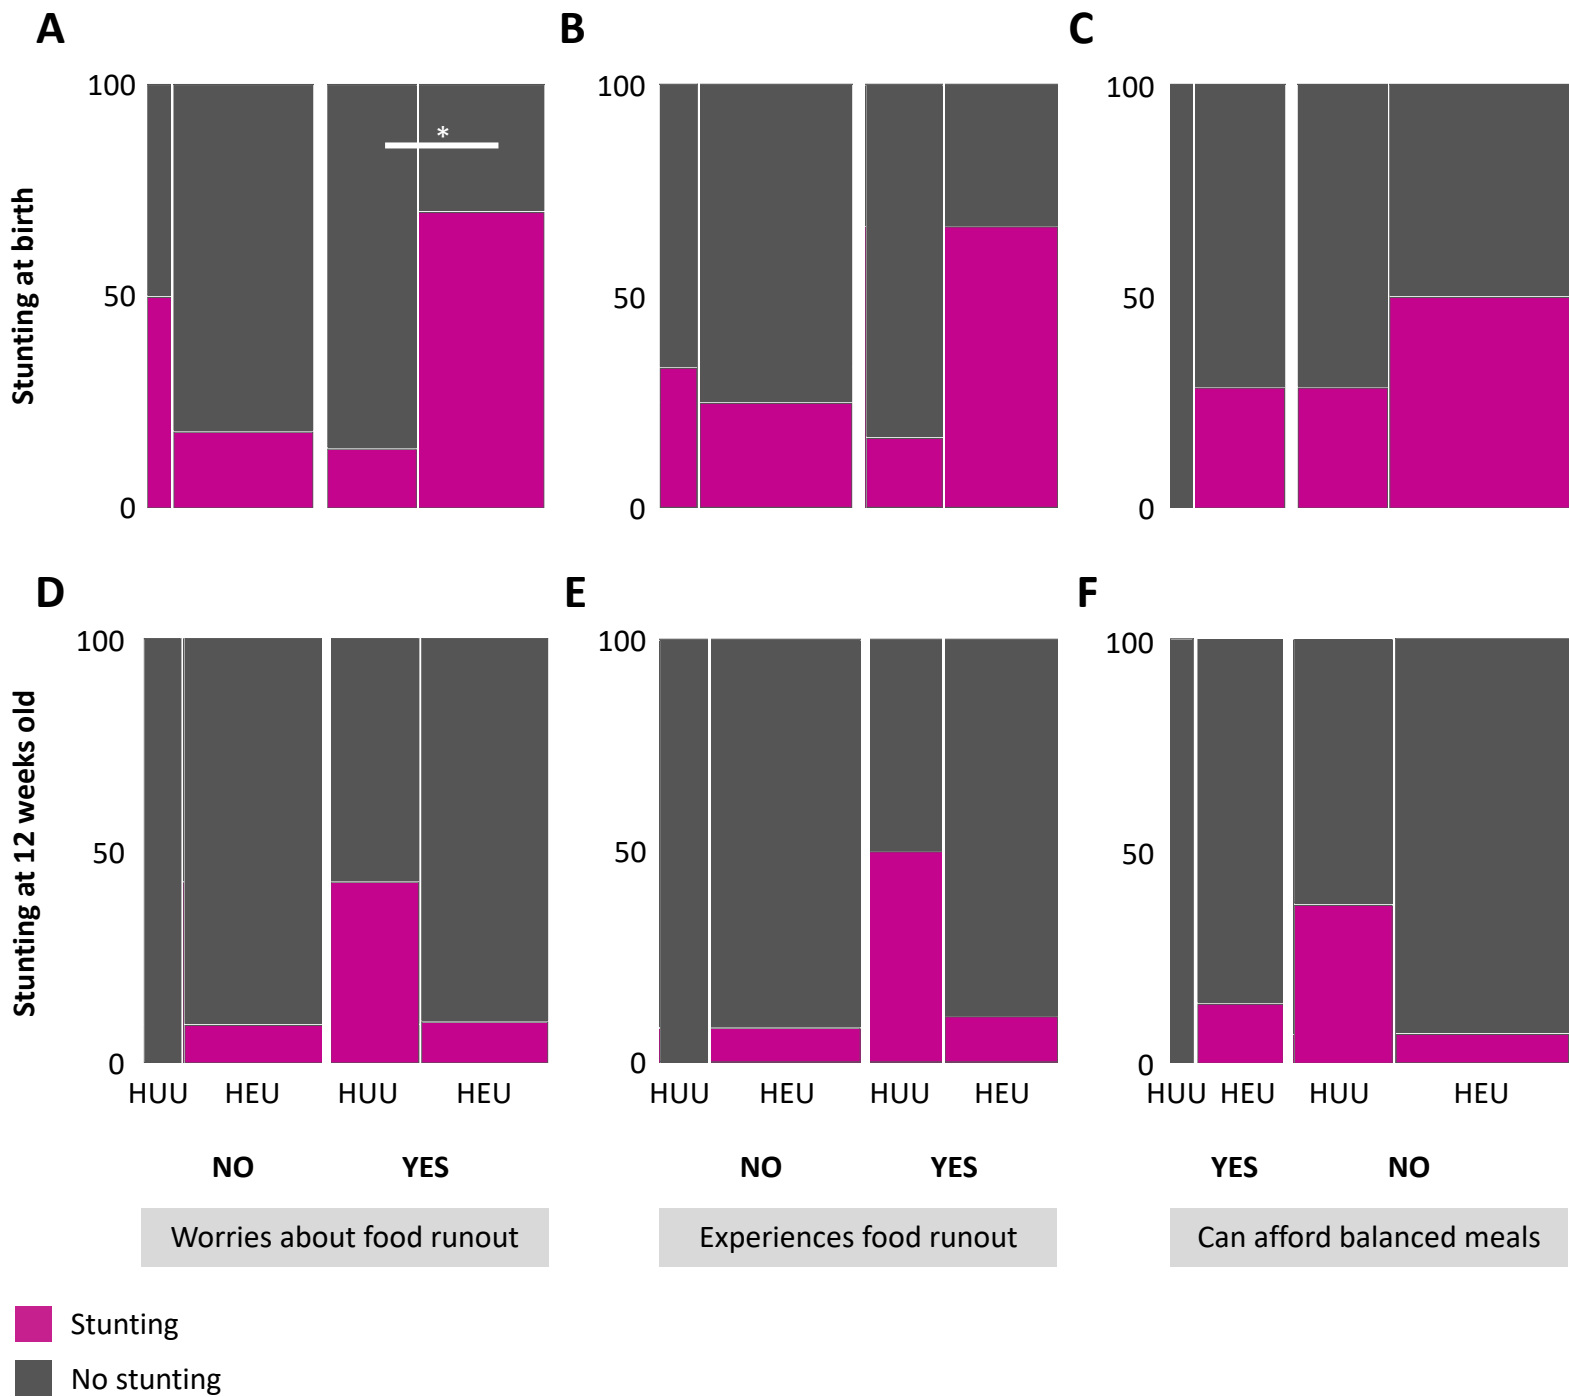

**Supplementary figure S4. Cooccurrence of maternal HIV and food insecurity may increase risk of stunting at birth.** Amongst infants whose mothers report worrying about food runout, risk of stunting at birth is greater for HEU compared to HUU infants (*e*; RR=4.90 [0.76, 31.5], ARD=0.56 [0.17, 0.94],  $p=0.0498$ ). The red line represents the proportion of infants who had stunting at birth or 12 weeks PP. Mosaic plots are proportion (%) of HUU or HEU infants who have stunting (<2 SD length-for-age standardised according to WHO child growth standards [28]) at birth and 12 weeks old. HUU = HIV-unexposed, uninfected infant; HEU = HIV-exposed, uninfected infant. RR = Relative risk. ARD = Absolute risk difference.
