# Supplementary material for: Does in utero HIV exposure and the early nutritional environment influence infant development and immune outcomes? Findings from a pilot study in Pretoria, South Africa
Source: PubMed Central journal article supplement (PMC7730756; doi:10.1186/s40814-020-00725-8), 2020-12-11
Supplement: 40814_2020_725_MOESM6_ESM.pdf [file 40814_2020_725_MOESM6_ESM.pdf]

**Supplementary table S1.** Flow cytometry reagent list (including lasers and detectors used).

| <b>Monoclonal antibody</b> | <b>Clone</b> | <b>Supplier</b>                 | <b>Excitation (laser)</b> | <b>Fluorescent Channel</b> | <b>Emission (Detector)</b> |
|----------------------------|--------------|---------------------------------|---------------------------|----------------------------|----------------------------|
| 7-AAD                      | N/A          | Beckman Coulter, Miami, FL, USA | 488 nm (blue)             | FL4                        | 695/30                     |
| CD16-FITC                  | 3G8          | BioLegend®, San Diego, CA, USA  | 488 nm (blue)             | FL1                        | 525/40                     |
| CD14-APC                   | 63D3         | BioLegend®, San Diego, CA, USA  | 635 nm (red)              | FL6                        | 660/20                     |
| CD192 (CCR2)-PE            | K036C2       | BioLegend®, San Diego, CA, USA  | 488 nm (blue)             | FL2                        | 575/30                     |

N/A: Not applicable

**Supplementary table S2.** Flow cytometry compensation matrix.

| <b>% Spillover</b> |            |            |            |            |
|--------------------|------------|------------|------------|------------|
|                    | <b>FL1</b> | <b>FL2</b> | <b>FL4</b> | <b>FL6</b> |
| <b>FL1</b>         | -          | 2.40       | 0.00       | 0.00       |
| <b>FL2</b>         | 5.00       | -          | 0.00       | 0.00       |
| <b>FL4</b>         | 0.00       | 59.98      | -          | 0.00       |
| <b>FL6</b>         | 0.00       | 0.00       | 0.00       | -          |

**Supplementary table S3.** Maternal nutrient intakes from one 24-hour dietary recall for mothers with and without HIV who attended follow up.

|                                          | <b>HIV-uninfected</b><br>(n=10) | <b>HIV-infected</b><br>(n=21) | <b>p value</b> |
|------------------------------------------|---------------------------------|-------------------------------|----------------|
| <b>Macronutrients – Absolute intakes</b> |                                 |                               |                |
| Energy (kJ)                              | 7339 (3862-7984)                | 5204 (4024-6590)              | NS             |
| Nitrogen (g)                             | 4.15 (2.26-6.29)                | 6.67 (4.87-8.20)              | 0.02           |
| Total protein (g)                        | 46.6 (23.7-57.6)                | 44.0 (33.2-61.6)              | NS             |
| Plant protein (g)                        | 26.0 (13.2-40.5)                | 18.9 (12.5-25.4)              | NS             |
| Animal protein (g)                       | 13.8 (3.3-33.5)                 | 27.5 (18.6-35.0)              | NS             |
| Total fat (g)                            | 30.6 (22.8-81.4)                | 33.9 (22.2-53.8)              | NS             |
| Carbohydrate, avail. (g)                 | 201 (140 - 282)                 | 160 (136-209)                 | NS             |
| Starch (g)                               | 0.00 (0-4.55)                   | 5.50 (0.1-9.3)                | 0.04           |
| Glucose (g)                              | 0.20 (0-5.8)                    | 3.70 (1.8-4.55)               | NS             |
| Fructose (g)                             | 0.20 (0-7.35)                   | 6.10 (0.65-6.8)               | NS             |
| Galactose (g)                            | 0.00 (0-0)                      | 0.00 (0-0)                    | -              |
| Sucrose (g)                              | 10.2 (0-33.3)                   | 15.1 (11.8-22.1)              | NS             |
| Maltose (g)                              | 0.00 (0-0)                      | 0.00 (0-0)                    | -              |
| Lactose (g)                              | 0.00 (0-3.38)                   | 0.00 (0-0.2)                  | NS             |
| Total sugars (g)                         | 23.1 (6.83-33.8)                | 29.0 (14.5-38.4)              | NS             |
| Added sugar (g)                          | 6.35 (0.53-67.0)                | 13.4 (10.6-26.05)             | NS             |
| Non-starch polysaccharides (g)           | 0.90 (0-10.5)                   | 3.60 (1.4-5.75)               | NS             |
| Insoluble NSP (g)                        | 0.55 (0-5.48)                   | 2.00 (0.9-2.8)                | NS             |
| Soluble NSP (g)                          | 0.35 (0-4.48)                   | 1.50 (0.55-2.6)               | NS             |
| Lignin (g)                               | 0.05 (0-0.38)                   | 0.20 (0.1-0.3)                | NS             |
| Total dietary fibre (g)                  | 17.0 (9.23-24.6)                | 12.2 (8.85-15.8)              | NS             |
| Insoluble dietary fibre (g)              | 0.60 (0-6.1)                    | 2.30 (0.95-3.2)               | NS             |
| Soluble dietary fibre (g)                | 0.35 (0-4.48)                   | 1.50 (0.55-2.6)               | NS             |
| Ash (g)                                  | 7.75 (3.8-13.8)                 | 6.10 (4.6-12.5)               | NS             |
| Moisture (g)                             | 623 (340-1073)                  | 789 (628-1030)                | NS             |
| <b>Minerals – Absolute intakes</b>       |                                 |                               |                |
| Ca (mg)                                  | 195 (106-382)                   | 132 (85-187)                  | NS             |
| Fe (mg)                                  | 11.3 (6.98-13.5)                | 10.9 (7.4-12.5)               | NS             |
| Haem iron (mg)                           | 0.05 (0-0.63)                   | 0.40 (0-0.55)                 | NS             |
| Non-haem iron (mg)                       | 1.95 (0.15-4.55)                | 3.30 (2.25-4.25)              | NS             |
| Mg (mg)                                  | 280 (116-347)                   | 168 (135-224)                 | NS             |
| P (mg)                                   | 723 (418-855)                   | 573 (420-731)                 | NS             |
| K (mg)                                   | 1838 (910-2858)                 | 1217 (925-1474)               | NS             |
| Na (mg)                                  | 2126 (1009-3923)                | 1608 (1010-3360)              | NS             |
| Cl (mg)                                  | 96.5 (30-406)                   | 397 (245-567)                 | 0.02           |
| Zn (mg)                                  | 6.95 (5.16-9.53)                | 9.46 (7.81-11.97)             | NS             |
| Cu (mg)                                  | 1.11 (0.48-1.27)                | 0.74 (0.5-0.96)               | NS             |
| Cr (mcg)                                 | 10.4 (0-47.03)                  | 31.00 (25.3-49.8)             | 0.05           |
| Se (mcg)                                 | 7.45 (4.38-20.3)                | 30.5 (24.9-43.5)              | <.001          |
| Mn (mcg)                                 | 1730 (716-2414)                 | 991 (801-1782)                | NS             |
| I (mcg)                                  | 91.0 (25.3-168)                 | 92.0 (63.5-189)               | NS             |
| B (mcg)                                  | 71.5 (0-11)                     | 438 (169-624)                 | NS             |
| F (mcg)                                  | 63.5 (0.75-153)                 | 111 (93-141)                  | NS             |
| Si (mcg)                                 | 0.00 (0-842)                    | 1776 (284-3838)               | 0.01           |

| <b>Vitamins – Absolute intakes</b>                         |                    |                   |        |
|------------------------------------------------------------|--------------------|-------------------|--------|
| Vitamin A (RE) (mcg)                                       | 423 (330-690)      | 430 (301-705)     | NS     |
| Retinol (mcg)                                              | 1.50 (0-73.75)     | 60.0 (33-75.5)    | NS     |
| Total carotenoids (mcg)                                    | 745 (0-3408)       | 384 (162-1434)    | NS     |
| β-Carotene (mcg)                                           | 627 (0-3368)       | 281 (156-1265)    | NS     |
| α-Carotene (mcg)                                           | 0.00 (0-36.3)      | 104 (0-123)       | NS     |
| Cryptoxanthin (mcg)                                        | 5.00 (0-39.3)      | 16.0 (1-23.5)     | NS     |
| Thiamin (mg)                                               | 1.06 (0.64-1.40)   | 1.08 (0.69-1.41)  | NS     |
| Riboflavin (mg)                                            | 0.51 (0.32-1.26)   | 0.76 (0.65-0.97)  | NS     |
| Niacin (mg)                                                | 14.6 (9.03-20.28)  | 16.3 (9.8-19.6)   | NS     |
| Vitamin B6 (mg)                                            | 2.36 (1.37-5.19)   | 3.13 (1.66-3.723) | NS     |
| Folate (mcg)                                               | 212 (180-383)      | 278 (207-312)     | NS     |
| Vitamin B12 (mcg)                                          | 1.65 (0.23-2.45)   | 1.80 (1.6-3.2)    | NS     |
| Pantothenate (mg)                                          | 2.33 (2.08-3.02)   | 2.95 (2.27-4.82)  | NS     |
| Biotin (mcg)                                               | 14.5 (10.1-27.8)   | 25.4 (20.8-34.7)  | NS     |
| Vitamin C (mg)                                             | 31.5 (2.25-91.5)   | 22.0 (10.5-62.5)  | NS     |
| Vitamin D (mcg)                                            | 0.86 (0.04-2.08)   | 6.45 (4.20-8.46)  | 0.002  |
| Vitamin E (mg)                                             | 5.24 (3.32-11.7)   | 7.91 (4.73-13.3)  | NS     |
| α-Tocopherol (mg)                                          | 0.38 (0-3.72)      | 6.08 (3.44-8.67)  | 0.005  |
| β-Tocopherol (mg)                                          | 0.00 (0-0.11)      | 0.20 (0.12-0.31)  | 0.002  |
| δ-Tocopherol (mg)                                          | 0.00 (0-0.02)      | 0.11 (0.11-0.22)  | <.001  |
| γ-Tocopherol (mg)                                          | 0.00 (0-0.21)      | 0.49 (0.45-0.83)  | 0.004  |
| α-Tocotrienol (mg)                                         | 0.00 (0-0.06)      | 0.07 (0.07-0.15)  | 0.005  |
| β-Tocotrienol (mg)                                         | 0.00 (0-0.02)      | 0.05 (0.03-0.06)  | 0.005  |
| δ-Tocotrienol (mg)                                         | 0.00 (0-0)         | 0.00 (0-0)        | -      |
| γ-Tocotrienol (mg)                                         | 0.00 (0-0.02)      | 0.01 (0-0.02)     | NS     |
| Lycopene (mcg)                                             | 0.00 (0-133)       | 0.00 (0-2.5)      | NS     |
| Lutein (mcg)                                               | 38.0 (0-7900)      | 51.0 (9-140)      | NS     |
| Vitamin K (mcg)                                            | 23.8 (0.05-403)    | 19.8 (8.9-57.2)   | NS     |
| <b>Fatty acids (FA) and cholesterol – Absolute intakes</b> |                    |                   |        |
| Saturated FA (g)                                           | 9.31 (5.67-14.9)   | 8.95 (6.34-13.2)  | NS     |
| Mono-unsaturated FA (g)                                    | 11.8 (7.01-19.6)   | 11.8 (7.90-16.4)  | NS     |
| Polyunsaturated FA (g)                                     | 6.74 (2.74-37.4)   | 7.15 (5.36-16.0)  | NS     |
| Single trans FA (g)                                        | 0.00 (0-0)         | 0.00 (0-0)        | -      |
| Double trans FA (g)                                        | 0.00 (0-0)         | 0.00 (0-0)        | -      |
| Total trans FA (g)                                         | 0.13 (0-1.27)      | 0.19 (0.03-0.34)  | NS     |
| Cholesterol (mg)                                           | 65.5 (30-130)      | 324 (259-461)     | <.0001 |
| C4:0 (g)                                                   | 0.00 (0-0.11)      | 0.00 (0-0)        | NS     |
| C6:0 (g)                                                   | 0.00 (0-0.07)      | 0.00 (0-0)        | NS     |
| C8:0 (g)                                                   | 0.00 (0-0.04)      | 0.00 (0-0.02)     | NS     |
| C10:0 (g)                                                  | 0.01 (0-0.09)      | 0.02 (0-0.05)     | NS     |
| C12:0 (g)                                                  | 0.04 (0.01-0.21)   | 0.04 (0.01-0.13)  | NS     |
| C13:0 (g)                                                  | 0.00 (0-0)         | 0.00 (0-0)        | -      |
| C14:0 (g)                                                  | 0.36 (0.06-0.94)   | 0.27 (0.18-0.45)  | NS     |
| C15:0 (g)                                                  | 0.00 (0-0)         | 0.02 (0.01-0.02)  | <.001  |
| C16:0 (g)                                                  | 5.10 (3.04 - 8.57) | 4.81 (3.68-7.16)  | NS     |
| C17:0 (g)                                                  | 0.00 (0-0.01)      | 0.01 (0-0.01)     | NS     |
| C18:0 (g)                                                  | 2.25 (1.36-3.23)   | 2.25 (1.9-3.72)   | NS     |
| C20:0 (g)                                                  | 0.09 (0.02-0.20)   | 0.05 (0.02-0.1)   | NS     |
| C21:0 (g)                                                  | 0.00 (0-0)         | 0.00 (0-0)        | -      |

|                                       |                   |                   |       |
|---------------------------------------|-------------------|-------------------|-------|
| C22:0 (g)                             | 0.05 (0-0.25)     | 0.04 (0.02-0.15)  | NS    |
| C23:0 (g)                             | 0.00 (0-0)        | 0.00 (0-0)        | -     |
| C24:0 (g)                             | 0.02 (0-0.10)     | 0.04 (0.02-0.10)  | NS    |
| C10:1 (g)                             | 0.00 (0-0)        | 0.00 (0-0)        | -     |
| C12:1 (g)                             | 0.00 (0-0)        | 0.00 (0-0)        | -     |
| C14:1 (g)                             | 0.00 (0-0.04)     | 0.01 (0-0.02)     | NS    |
| C15:1 (g)                             | 0.00 (0-0)        | 0.00 (0-0)        | -     |
| C16:1 (g)                             | 0.33 (0.19-0.53)  | 0.60 (0.48-0.97)  | 0.01  |
| C17:1 (g)                             | 0.00 (0-0)        | 0.00 (0-0)        | NS    |
| C18:1 (g)                             | 10.49 (5.57-18.4) | 10.09 (6.54-14.5) | NS    |
| C20:1 (g)                             | 0.10 (0.03-0.25)  | 0.04 (0.02-0.11)  | NS    |
| C22:1 (g)                             | 0.04 (0-0.21)     | 0.00 (0-0.03)     | NS    |
| C23:1 (g)                             | 0.00 (0-0)        | 0.00 (0-0)        | -     |
| C24:1 (g)                             | 0.00 (0-0)        | 0.00 (0-0)        | -     |
| C18:2 (g)                             | 5.71 (1.42-35.7)  | 5.54 (4.09-12.3)  | NS    |
| C18:3 (g)                             | 0.26 (0.11-0.99)  | 0.21 (0.14-0.4)   | NS    |
| C18:4 (g)                             | 0.00 (0-0.005)    | 0.00 (0-0)        | NS    |
| C20:2 (g)                             | 0.00 (0-0.01)     | 0.04 (0.03-0.06)  | 0.001 |
| C20:4 (g)                             | 0.04 (0-0.07)     | 0.07 (0.04-0.1)   | NS    |
| C20:5 (g)                             | 0.02 (0-0.04)     | 0.03 (0.02-0.04)  | NS    |
| C22:2 (g)                             | 0.00 (0-0.003)    | 0.01 (0-0.01)     | 0.03  |
| C22:3 (g)                             | 0.00 (0-0)        | 0.00 (0-0)        | -     |
| C22:4 (g)                             | 0.00 (0-0)        | 0.00 (0-0)        | -     |
| C22:5 (g)                             | 0.00 (0-0.01)     | 0.00 (0-0.01)     | NS    |
| C22:6 (g)                             | 0.03 (0-0.07)     | 0.07 (0.04-0.08)  | NS    |
| C24:6 (g)                             | 0.00 (0-0)        | 0.00 (0-0)        | -     |
| C20:3 (g)                             | 0.00 (0-0.01)     | 0.00 (0-0.01)     | NS    |
| <b>Amino acids – Absolute intakes</b> |                   |                   |       |
| Isoleucine (g)                        | 1.46 (0.74-2.10)  | 1.41 (1.16-2.16)  | NS    |
| Leucine (g)                           | 2.76 (1.38-4.08)  | 2.78 (2.14-3.88)  | NS    |
| Lysine (g)                            | 1.72 (0.98-2.90)  | 2.46 (1.55-3.195) | NS    |
| Methionine (g)                        | 0.83 (0.41-0.96)  | 0.92 (0.65-1.19)  | NS    |
| Phenylalanine (g)                     | 1.59 (0.79-2.39)  | 1.59 (1.21-2.36)  | NS    |
| Threonine (g)                         | 1.31 (0.70-1.92)  | 1.43 (1.07-1.98)  | NS    |
| Tryptophan (g)                        | 0.46 (0.27-0.63)  | 0.54 (0.38-0.71)  | NS    |
| Valine (g)                            | 1.72 (0.85-2.47)  | 1.68 (1.36-2.49)  | NS    |
| Arginine (g)                          | 1.69 (1.13-2.83)  | 2.23 (1.53-3.27)  | NS    |
| Histidine (g)                         | 0.88 (0.41-1.24)  | 0.93 (0.73-1.29)  | NS    |
| Cystine (g)                           | 0.33 (0.20-0.48)  | 0.64 (0.53-0.81)  | <.001 |
| Tyrosine (g)                          | 0.69 (0.29-1.02)  | 1.06 (0.73-1.40)  | 0.03  |
| Alanine (g)                           | 0.85 (0.35-1.60)  | 1.59 (1.11-2.23)  | 0.02  |
| Aspartic acid (g)                     | 1.45 (0.80-2.69)  | 2.90 (1.78-3.53)  | 0.04  |
| Glutamic acid (g)                     | 4.76 (3.04-5.91)  | 5.50 (3.31-8.31)  | NS    |
| Glycine (g)                           | 0.73 (0.36-1.44)  | 1.33 (0.93-2.00)  | 0.03  |
| Proline (g)                           | 1.43 (0.89-2.01)  | 1.74 (1.09-2.58)  | NS    |
| Serine (g)                            | 0.98 (0.46-1.59)  | 1.65 (1.33-2.02)  | 0.01  |
| Hydroxyproline (g)                    | 0.02 (0-0.18)     | 0.09 (0-0.17)     | NS    |
| Alcohol (g)                           | 0.00 (0-0)        | 0.00 (0-0)        | -     |
| Phytate (mg)                          | 155 (6-192)       | 192 (99.5-225)    | NS    |
| Malic acid (mg)                       | 38.0 (0-879)      | 305 (14.5-612.5)  | NS    |

|                                |                  |                  |    |
|--------------------------------|------------------|------------------|----|
| Citric acid (mg)               | 276.50 (0-1275)  | 221 (77-508)     | NS |
| Tartaric acid (mg)             | 0.00 (0-0)       | 0.00 (0-0)       | NS |
| Oxalic acid (mg)               | 6.00 (0-384)     | 11.0 (0-37.5)    | NS |
| Caffeine (mg)                  | 0.00 (0-0)       | 0.00 (0-0)       | -  |
| Tannins (mg)                   | 0.00 (0-0)       | 0.00 (0-0)       | -  |
| <b>Energy – %</b>              |                  |                  |    |
| % Energy - Protein             | 0.13 (0.08-0.18) | 0.15 (0.13-0.18) | NS |
| % Energy - Fat                 | 0.20 (0.13-0.40) | 0.25 (0.21-0.31) | NS |
| % Energy - Saturated SFA       | 0.06 (0.04-0.07) | 0.06 (0.05-0.09) | NS |
| % Energy - Mono-unsaturated FA | 0.07 (0.05-0.12) | 0.09 (0.08-0.11) | NS |
| % Energy – Polyunsaturated FA  | 0.04 (0.02-0.16) | 0.06 (0.04-0.09) | NS |
| % Energy - Carbohydrate        | 0.64 (0.52-0.70) | 0.59 (0.51-0.65) | NS |

Data from mother-infant dyads that attended follow up are presented as median (IQR) and p values are from univariate analysis (Kruskal-Wallis/Wilcoxon test for non-parametric data; ANOVA for normal data with equal variance). Iodised salt was assumed to be consumed by all mothers, as the majority of salt consumed in South Africa is iodised (61).

**Supplementary table S4.** Maternal nutrient intake from one 24-hour dietary recall for mothers who report experiencing food insecurity compared to those who do not experience food insecurity.

|                                          | Do you worry about food runout? |                   |         |
|------------------------------------------|---------------------------------|-------------------|---------|
|                                          | NO                              | YES               | p value |
|                                          | n=14                            | n=17              |         |
| <b>Dietary diversity score (/9)</b>      | 4.50 (4.00, 6.00)               | 4.00 (3.00, 5.50) | NS      |
| <b>Dietary diversity score &lt;4 (n)</b> | 2                               | 5                 | NS      |
| <b>Absolute intakes</b>                  |                                 |                   |         |
| <b>Macronutrients</b>                    |                                 |                   |         |
| Moisture (g)                             | 868 (629, 1029)                 | 670 (507, 1092)   | NS      |
| Energy (kJ)                              | 5601 (4792, 6855)               | 5204 (3264, 8103) | NS      |
| Nitrogen (g)                             | 7.15 (5.55, 8.82)               | 4.63 (3.93, 6.57) | NS      |
| Total protein (g)                        | 51.4 (43.8, 63.2)               | 37.9 (26.3, 53.8) | NS      |
| Plant protein (g)                        | 19.6 (17.1, 26.0)               | 22.3 (11.1, 37.5) | NS      |
| Animal protein (g)                       | 29.0 (19.3, 39.0)               | 16.3 (3.85, 30.0) | 0.03    |
| Total fat (g)                            | 36.5 (30.0, 51.8)               | 25.8 (20.6, 65.1) | NS      |
| Carbohydrates, avail. (g)                | 162 (159, 200)                  | 161 (97.0, 277)   | NS      |
| Starch (g)                               | 5.6 (0.18, 10.3)                | 0.00 (0.00, 8.1)  | NS      |
| Glucose (g)                              | 3.95 (2.40, 5.00)               | 1.80 (0.00, 3.55) | 0.04    |
| Fructose (g)                             | 6.50 (0.90, 7.45)               | 0.70 (0.00, 6.30) | NS      |
| Sucrose (g)                              | 17.7 (12.0, 32.9)               | 12.0 (1.70, 23.6) | NS      |
| Maltose (g) <sup>1</sup>                 |                                 | 0.1               |         |
| Galactose <sup>2</sup>                   |                                 |                   |         |
| Lactose (g)                              | 0.00 (0.00, 2.10)               | 0.00 (0.00, 0.05) | NS      |
| Total sugars (g)                         | 30.3 (23.4, 41.7)               | 15.8 (8.05, 34.5) | NS      |
| Added sugar (g)                          | 25.6 (12.0, 41.0)               | 8.00 (0.50, 18.8) | 0.01    |
| Total dietary fibre (g)                  | 13.4 (11.0, 16.7)               | 12.2 (6.70, 21.1) | NS      |
| Insoluble dietary fibre (g)              | 2.75 (1.33, 3.60)               | 1.40 (0.00, 3.45) | NS      |
| Soluble dietary fibre (g)                | 1.85 (1.05, 2.70)               | 0.80 (0.00, 3.40) | NS      |
| Ash (g)                                  | 6.05 (4.65, 6.53)               | 9.30 (4.30, 14.8) | NS      |
| Non-starch polysaccharides (g)           | 4.20 (2.13, 5.98)               | 2.10 (0.00, 6.45) | NS      |
| Insoluble NSP (g)                        | 2.25 (1.15, 3.03)               | 1.40 (0.00, 3.05) | NS      |
| Soluble NSP (g)                          | 1.85 (1.05, 2.70)               | 0.80 (0.00, 3.40) | NS      |
| Lignin (g)                               | 0.20 (0.10, 0.30)               | 0.10 (0.00, 0.30) | NS      |
| <b>Amino acids</b>                       |                                 |                   |         |
| Isoleucine (g)                           | 1.78 (1.34, 2.26)               | 1.24 (0.80, 1.83) | NS      |
| Leucine (g)                              | 3.48 (2.68, 4.06)               | 2.18 (1.51, 3.34) | NS      |
| lysine (g)                               | 2.59 (1.84, 3.67)               | 1.52 (1.04, 2.65) | NS      |
| Methionine (g)                           | 0.96 (0.88, 1.17)               | 0.65 (0.47, 0.91) | 0.01    |
| Phenylalanine (g)                        | 2.01 (1.53, 2.35)               | 1.32 (0.90, 2.11) | NS      |
| Threonine (g)                            | 1.73 (1.33, 2.10)               | 1.08 (0.76, 1.71) | NS      |
| Tryptophan (g)                           | 0.61 (0.53, 0.71)               | 0.38 (0.30, 0.57) | 0.02    |
| Valine (g)                               | 212 (1.67, 2.45)                | 1.38 (0.98, 2.23) | NS      |
| Arginine (g)                             | 2.53 (1.86, 3.36)               | 1.48 (1.18, 2.77) | NS      |
| Histidine (g)                            | 1.14 (0.85, 1.37)               | 0.73 (0.44, 1.27) | 0.05    |
| Cystine (g)                              | 0.62 (0.53, 0.87)               | 0.48 (0.31, 0.66) | 0.02    |
| Tyrosine (g)                             | 1.12 (0.87, 1.44)               | 0.79 (0.46, 1.06) | NS      |
| Alanine (g)                              | 1.74 (1.28, 2.28)               | 1.16 (0.67, 1.65) | 0.04    |

|                                             |                   |                   |                |
|---------------------------------------------|-------------------|-------------------|----------------|
| Aspartic acid (g)                           | 3.01 (2.24, 3.71) | 1.87 (1.12, 2.92) | NS             |
| Glutamic acid (g)                           | 6.24 (4.72, 8.31) | 4.43 (1.96, 5.83) | NS             |
| Glycine (g)                                 | 1.47 (1.03, 2.10) | 1.02 (0.52, 1.47) | NS             |
| Proline (g)                                 | 2.00 (1.47, 2.63) | 1.36 (0.56, 1.87) | 0.05           |
| Serine (g)                                  | 1.65 (1.50, 2.14) | 1.20 (0.86, 1.67) | 0.03           |
| Hydroxyproline (g)                          | 0.10 (0.06, 0.22) | 0.00 (0.00, 0.11) | NS             |
| <b>Fatty acids and cholesterol</b>          |                   |                   |                |
| Saturated FA (g)                            | 9.55 (8.56, 15.2) | 7.88 (5.74, 11.4) | NS             |
| Mono-unsaturated FA (g)                     | 12.5 (10.5, 15.8) | 10.9 (7.19, 21.8) | NS             |
| Polyunsaturated FA (g)                      | 8.70 (6.26, 15.3) | 5.46 (3.37, 20.2) | NS             |
| Single trans FA (g) <sup>2</sup>            |                   |                   |                |
| Double trans FA (g) <sup>2</sup>            |                   |                   |                |
| Total trans FA (g)                          | 0.20 (0.16, 0.82) | 0.06 (0.00, 0.35) | NS             |
| Cholesterol (mg)                            | 291 (236, 544)    | 117 (33.0, 420)   | 0.04           |
| <b>Median intake (%) of TULs by mothers</b> |                   |                   |                |
| <b>Minerals</b>                             |                   |                   |                |
| Calcium (Ca)                                | 5.88 (4.56, 9.55) | 4.52 (2.76, 10.5) | NS             |
| Iron (Fe)                                   | 25.6 (21.7, 27.1) | 18.2 (12.8, 31.6) | NS             |
| Magnesium (Mg)                              | 52.1 (44.6, 71.4) | 57.1 (30.0, 97.0) | NS             |
| Phosphorus (P)                              | 16.7 (12.9, 19.9) | 12.1 (9.14, 18.9) | NS             |
| Sodium (Na)                                 | 67.5 (48.0, 91.7) | 127 (42.5, 210)   | NS             |
| Zinc (Zn)                                   | 22.3 (20.1, 29.6) | 19.6 (14.7, 27.1) | NS             |
| Copper (Cu)                                 | 8.15 (6.35, 10.6) | 6.90 (3.95, 12.1) | NS             |
| Selenium (Se)                               | 7.56 (5.41, 11.6) | 6.18 (1.86, 9.73) | NS             |
| Manganese (Mn)                              | 12.8 (8.46, 18.2) | 12.7 (5.59, 18.9) | NS             |
| Iodine (I)                                  | 7.82 (3.73, 12.8) | 13.6 (4.59, 19.1) | NS             |
| <b>Vitamins</b>                             |                   |                   |                |
| Vitamin A                                   | 14.2 (11.2, 18.8) | 14.1 (8.57, 26.9) | NS             |
| Niacin                                      | 47.4 (42.0, 55.6) | 40.0 (24.4, 60.6) | NS             |
| Vitamin B6                                  | 3.20 (2.74, 3.68) | 2.14 (1.22, 4.17) | NS             |
| Folate                                      | 27.8 (21.3, 29.6) | 24.1 (19.8, 48.6) | NS             |
| Vitamin C                                   | 1.28 (0.90, 2.45) | 0.60 (0.08, 6.38) | NS             |
| Vitamin D                                   | 4.73 (4.15, 8.76) | 1.39 (0.39, 7.86) | NS             |
| Vitamin E                                   | 0.73 (0.49, 1.21) | 0.68 (0.41, 1.30) | NS             |
| <b>Do you experience food runoff?</b>       |                   |                   |                |
|                                             | <b>NO</b>         | <b>YES</b>        | <b>p value</b> |
|                                             | n=16              | n=15              |                |
| <b>Dietary diversity score (/9)</b>         | 5.00 (4.00, 6.00) | 3.00 (4.00, 5.00) | NS             |
| <b>Dietary diversity score &lt;4 (n)</b>    | 2                 | 5                 | NS             |
| <b>Absolute intakes</b>                     |                   |                   |                |
| <b>Macronutrients</b>                       |                   |                   |                |
| Moisture (g)                                | 868 (620, 1030)   | 670 (409, 1011)   | NS             |
| Energy (kJ)                                 | 5601 (4659, 7004) | 5204 (3247, 8339) | NS             |
| Nitrogen (g)                                | 7.15 (5.68, 9.29) | 4.31 (3.87, 6.10) | 0.02           |
| Total protein (g)                           | 51.4 (42.5, 68.7) | 32.9 (26.1, 44.7) | 0.03           |

|                                    |                   |                   |       |
|------------------------------------|-------------------|-------------------|-------|
| Plant protein (g)                  | 19.6 (15.8, 27.3) | 22.3 (11.5, 34.9) | NS    |
| Animal protein (g)                 | 29.0 (19.7, 38.0) | 15.4 (3.30, 21.4) | 0.01  |
| Total fat (g)                      | 35.0 (29.9, 45.8) | 25.8 (19.6, 69.0) | NS    |
| Carbohydrates, avail. (g)          | 162 (159, 234)    | 161 (93.8, 280)   | NS    |
| Starch (g)                         | 5.60 (0.13, 10.1) | 0.00 (0.00, 5.40) | NS    |
| Glucose (g)                        | 3.95 (2.75, 5.60) | 1.20 (0.00, 3.40) | 0.01  |
| Fructose (g)                       | 6.50 (1.20, 8.15) | 0.40 (0.00, 6.10) | 0.01  |
| Sucrose (g)                        | 19.1 (12.4, 30.1) | 8.40 (1.00, 17.9) | 0.03  |
| Maltose (g) <sup>1</sup>           |                   | 0.1               |       |
| Galactose <sup>2</sup>             |                   |                   |       |
| Lactose (g)                        | 0.00 (0.00, 1.60) | 0.00 (0.00, 0.10) | NS    |
| Total sugars (g)                   | 31.2 (24.3, 42.5) | 13.1 (7.00, 30.9) | 0.02  |
| Added sugar (g)                    | 17.6 (12.0, 40.5) | 8.00 (0.30, 21.0) | 0.04  |
| Total dietary fibre (g)            | 13.4 (10.9, 17.2) | 12.2 (6.20, 18.4) | NS    |
| Insoluble dietary fibre (g)        | 3.15 (1.68, 4.08) | 1.20 (0.00, 3.20) | 0.04  |
| Soluble dietary fibre (g)          | 2.20 (1.30, 2.70) | 0.70 (0.00, 2.90) | NS    |
| Ash (g)                            | 6.05 (4.55, 6.58) | 10.5 (4.20, 14.8) | NS    |
| Non-starch polysaccharides (g)     | 4.85 (2.68, 6.33) | 1.80 (0.00, 5.90) | NS    |
| Insoluble NSP (g)                  | 2.60 (1.43, 3.50) | 1.10 (0.00, 2.80) | NS    |
| Soluble NSP (g)                    | 2.20 (1.30, 2.70) | 0.70 (0.00, 2.90) | NS    |
| Lignin (g)                         | 0.25 (0.13, 0.38) | 0.00 (0.00, 0.20) | 0.01  |
| <b>Amino acids</b>                 |                   |                   |       |
| Isoleucine (g)                     | 1.78 (1.38, 2.43) | 1.08 (0.79, 1.47) | 0.05  |
| Leucine (g)                        | 3.48 (2.77, 4.47) | 1.95 (1.47, 2.75) | 0.03  |
| lysine (g)                         | 2.59 (1.99, 3.80) | 1.23 (1.03, 2.57) | 0.03  |
| Methionine (g)                     | 0.96 (0.88, 1.13) | 0.61 (0.45, 0.85) | 0.002 |
| Phenylalanine (g)                  | 2.01 (1.55, 2.51) | 1.22 (0.80, 1.69) | 0.04  |
| Threonine (g)                      | 1.73 (1.38, 2.22) | 0.95 (0.74, 1.43) | 0.02  |
| Tryptophan (g)                     | 0.61 (0.53, 0.76) | 0.34 (0.30, 0.51) | 0.003 |
| Valine (g)                         | 2.12 (1.68, 2.56) | 1.24 (0.87, 1.75) | 0.04  |
| Arginine (g)                       | 2.53 (1.96, 3.57) | 1.48 (1.17, 2.12) | 0.03  |
| Histidine (g)                      | 1.14 (0.89, 1.51) | 0.64 (0.42, 1.26) | 0.01  |
| Cystine (g)                        | 0.62 (0.52, 0.81) | 0.48 (0.30, 0.62) | 0.02  |
| Tyrosine (g)                       | 1.14 (0.94, 1.42) | 0.75 (0.46, 0.90) | 0.03  |
| Alanine (g)                        | 1.75 (1.37, 2.29) | 0.92 (0.66, 1.46) | 0.006 |
| Aspartic acid (g)                  | 3.01 (2.46, 3.74) | 1.47 (1.04, 2.90) | 0.04  |
| Glutamic acid (g)                  | 5.85 (5.25, 8.12) | 4.33 (1.70, 5.78) | NS    |
| Glycine (g)                        | 1.52 (1.13, 2.14) | 0.84 (0.42, 1.30) | 0.009 |
| Proline (g)                        | 1.85 (1.58, 2.59) | 1.28 (0.51, 1.92) | 0.03  |
| Serine (g)                         | 1.68 (1.52, 2.02) | 1.09 (0.85, 1.48) | 0.01  |
| Hydroxyproline (g)                 | 0.11 (0.06, 0.26) | 0.00 (0.00, 0.07) | 0.005 |
| <b>Fatty acids and cholesterol</b> |                   |                   |       |
| Saturated FA (g)                   | 9.68 (8.88, 14.7) | 6.80 (5.69, 12.9) | 0.03  |
| Mono-unsaturated FA (g)            | 11.7 (10.4, 15.0) | 12.0 (6.86, 25.7) | NS    |
| Polyunsaturated FA (g)             | 7.67 (5.87, 13.9) | 5.47 (3.88, 22.7) | NS    |
| Single trans FA (g) <sup>2</sup>   |                   |                   |       |
| Double trans FA (g) <sup>2</sup>   |                   |                   |       |
| Total trans FA (g)                 | 0.21 (0.16, 0.75) | 0.04 (0.00, 0.20) | 0.03  |



|                                               |                   |                   |                |
|-----------------------------------------------|-------------------|-------------------|----------------|
| Cholesterol (mg)                              | 291 (191, 524)    | 112 (26.0, 416)   | 0.03           |
| <b>Median intake (%) of TULs by mothers</b>   |                   |                   |                |
| <b>Minerals</b>                               |                   |                   |                |
| Calcium (Ca)                                  | 5.88 (4.56, 9.90) | 4.52 (2.72, 9.56) | NS             |
| Iron (Fe)                                     | 25.6 (21.0, 27.4) | 18.2 (12.0, 30.2) | NS             |
| Magnesium (Mg)                                | 52.1 (43.1, 74.6) | 57.1 (30.3, 95.1) | NS             |
| Phosphorus (P)                                | 16.7 (12.8, 20.7) | 12.1 (8.65, 18.5) | NS             |
| Sodium (Na)                                   | 61.9 (47.6, 84.9) | 132 (51.2, 221)   | NS             |
| Zinc (Zn)                                     | 23.3 (20.2, 30.3) | 17.7 (14.4, 24.2) | NS             |
| Copper (Cu)                                   | 8.15 (6.43, 11.7) | 6.90 (3.90, 11.0) | NS             |
| Selenium (Se)                                 | 7.63 (5.91, 11.2) | 5.58 (1.80, 7.78) | NS             |
| Manganese (Mn)                                | 12.8 (8.77, 19.3) | 12.7 (5.36, 16.7) | NS             |
| Iodine (I)                                    | 7.67 (3.73, 11.2) | 14.0 (5.09, 19.6) | NS             |
| <b>Vitamins</b>                               |                   |                   |                |
| Vitamin A                                     | 14.2 (10.5, 20.9) | 14.1 (8.54, 25.2) | NS             |
| Niacin                                        | 47.4 (41.4, 55.9) | 40.0 (23.4, 55.7) | NS             |
| Vitamin B6                                    | 3.20 (2.72, 3.89) | 1.89 (1.16, 3.80) | NS             |
| Folate                                        | 27.8 (20.0, 30.1) | 24.1 (20.5, 47.6) | NS             |
| Vitamin C                                     | 1.34 (0.99, 2.55) | 0.55 (0.00, 6.25) | NS             |
| Vitamin D                                     | 4.73 (4.14, 8.60) | 1.39 (0.05, 7.86) | NS             |
| Vitamin E                                     | 0.73 (0.49, 1.16) | 0.68 (0.39, 1.46) | NS             |
| <b>Are you able to afford balanced meals?</b> |                   |                   |                |
|                                               | <b>YES</b>        | <b>NO</b>         | <b>p value</b> |
|                                               | n=9               | n=22              |                |
| <b>Dietary diversity score (/9)</b>           | 4.00 (3.50, 5.50) | 4.00 (3.75, 6.00) | NS             |
| <b>Dietary diversity score &lt;4 (n)</b>      | 2                 | 5                 | NS             |
| <b>Absolute intakes</b>                       |                   |                   |                |
| <b>Macronutrients</b>                         |                   |                   |                |
| Moisture (g)                                  | 789 (614, 1037)   | 806 (564, 1016)   | NS             |
| Energy (kJ)                                   | 5691 (4519, 7046) | 5358 (3538, 7505) | NS             |
| Nitrogen (g)                                  | 6.94 (5.00, 9.53) | 5.52 (4.03, 7.37) | NS             |
| Total protein (g)                             | 53.3 (41.5, 67.7) | 40.9 (27.5, 54.6) | NS             |
| Plant protein (g)                             | 19.9 (17.0, 33.1) | 20.6 (11.6, 34.0) | NS             |
| Animal protein (g)                            | 28.5 (19.0, 38.5) | 18.9 (9.65, 33.2) | NS             |
| Total fat (g)                                 | 37.5 (25.1, 57.2) | 31.0 (21.9, 63.1) | NS             |
| Carbohydrates, avail. (g)                     | 165 (158, 229)    | 160 (106, 259)    | NS             |
| Starch (g)                                    | 5.60 (0.05, 6.80) | 0.20 (0.00, 12.5) | NS             |
| Glucose (g)                                   | 3.80 (2.50, 5.25) | 2.55 (0.30, 4.55) | NS             |
| Fructose (g)                                  | 6.50 (1.90, 7.75) | 1.10 (0.00, 6.65) | NS             |
| Sucrose (g)                                   | 20.4 (16.3, 28.1) | 12.0 (3.98, 23.9) | NS             |
| Maltose (g) <sup>1</sup>                      |                   | 0.1               |                |
| Galactose <sup>2</sup>                        |                   |                   |                |
| Lactose (g)                                   | 0.00 (0.00, 2.40) | 0.00 (0.00, 0.15) | NS             |
| Total sugars (g)                              | 32.0 (29.6, 39.5) | 20.8 (9.10, 37.1) | NS             |
| Added sugar (g)                               | 13.4 (10.5, 25.6) | 12.0 (3.70, 39.5) | NS             |
| Total dietary fibre (g)                       | 14.5 (11.6, 16.3) | 12.3 (8.10, 17.9) | NS             |

|                                             |                   |                   |      |
|---------------------------------------------|-------------------|-------------------|------|
| Insoluble dietary fibre (g)                 | 3.10 (1.35, 3.90) | 1.75 (0.00, 3.33) | NS   |
| Soluble dietary fibre (g)                   | 2.20 (0.85, 2.75) | 1.30 (0.00, 2.75) | NS   |
| Ash (g)                                     | 6.10 (4.25, 6.55) | 6.15 (4.63, 14.6) | NS   |
| Non-starch polysaccharides (g)              | 4.90 (2.00, 6.25) | 2.75 (0.00, 6.05) | NS   |
| Insoluble NSP (g)                           | 2.50 (1.05, 3.30) | 1.45 (0.00, 2.98) | NS   |
| Soluble NSP (g)                             | 2.20 (0.85, 2.75) | 0.00 (1.30, 2.75) | NS   |
| Lignin (g)                                  | 0.30 (0.20, 0.40) | 0.10 (0.00, 0.23) | NS   |
| <b>Amino acids</b>                          |                   |                   |      |
| Isoleucine (g)                              | 1.77 (1.26, 2.55) | 1.50 (0.89, 1.95) | NS   |
| Leucine (g)                                 | 3.36 (2.60, 2.46) | 2.47 (1.58, 3.71) | NS   |
| lysine (g)                                  | 2.71 (1.81, 4.05) | 1.74 (1.06, 2.65) | NS   |
| Methionine (g)                              | 1.06 (0.93, 2.44) | 1.01 (0.78, 1.64) | NS   |
| Phenylalanine (g)                           | 1.96 (1.42, 2.43) | 1.51 (1.00, 2.22) | NS   |
| Threonine (g)                               | 1.69 (1.26, 2.23) | 1.25 (0.79, 1.81) | NS   |
| Tryptophan (g)                              | 0.59 (0.48, 0.77) | 0.42 (0.31, 0.63) | NS   |
| Valine (g)                                  | 2.01 (1.53, 2.58) | 1.57 (1.12, 2.38) | NS   |
| Arginine (g)                                | 2.44 (1.79, 3.49) | 1.80 (1.28, 2.68) | NS   |
| Histidine (g)                               | 1.16 (0.82, 1.51) | 0.76 (0.50, 1.20) | NS   |
| Cystine (g)                                 | 0.60 (0.48, 0.78) | 0.52 (0.34, 0.72) | NS   |
| Tyrosine (g)                                | 1.09 (0.80, 1.40) | 0.85 (0.49, 1.10) | NS   |
| Alanine (g)                                 | 1.76 (1.20, 2.32) | 1.24 (0.73, 1.73) | NS   |
| Aspartic acid (g)                           | 2.93 (2.06, 3.90) | 1.87 (1.30, 3.02) | NS   |
| Glutamic acid (g)                           | 5.71 (4.26, 7.54) | 4.58 (2.39, 6.46) | NS   |
| Glycine (g)                                 | 1.49 (1.06, 2.13) | 1.04 (0.63, 1.48) | NS   |
| Proline (g)                                 | 1.81 (1.36, 2.35) | 1.38 (0.78, 2.36) | NS   |
| Serine (g)                                  | 1.65 (1.29, 2.02) | 1.43 (0.91, 1.71) | NS   |
| Hydroxyproline (g)                          | 0.11 (0.07, 0.24) | 0.00 (0.00, 0.11) | 0.04 |
| <b>Fatty acids and cholesterol</b>          |                   |                   |      |
| Saturated FA (g)                            | 9.77 (8.33, 19.5) | 7.96 (5.98, 12.1) | NS   |
| Mono-unsaturated FA (g)                     | 11.8 (8.26, 16.4) | 11.5 (7.6, 21.8)  | NS   |
| Polyunsaturated FA (g)                      | 9.40 (4.85, 15.5) | 6.34 (4.49, 18.4) | NS   |
| Single trans FA (g) <sup>2</sup>            |                   |                   |      |
| Double trans FA (g) <sup>2</sup>            |                   |                   |      |
| Total trans FA (g)                          | 0.73 (0.16, 1.00) | 0.06 (0.00, 0.21) | 0.03 |
| Cholesterol (mg)                            | 269 (213, 326)    | 261 (45.5, 446)   | NS   |
| <b>Median intake (%) of TULs by mothers</b> |                   |                   |      |
| <b>Minerals</b>                             |                   |                   |      |
| Calcium (Ca)                                | 7.04 (4.90, 11.7) | 4.76 (3.01, 8.33) | NS   |
| Iron (Fe)                                   | 25.8 (213, 30.0)  | 24.2 (14.6, 28.3) | NS   |
| Magnesium (Mg)                              | 54.0 (46.4, 78.7) | 52.1 (30.7, 88.6) | NS   |
| Phosphorus (P)                              | 15.2 (12.9, 21.2) | 14.6 (9.83, 18.9) | NS   |
| Sodium (Na)                                 | 65.1 (48.4, 95.0) | 73.6 (45.0, 181)  | NS   |
| Zinc (Zn)                                   | 20.9 (20.2, 36.8) | 21.0 (15.2, 26.6) | NS   |
| Copper (Cu)                                 | 8.60 (6.30, 10.7) | 7.15 (4.45, 11.4) | NS   |
| Selenium (Se)                               | 7.50 (6.03, 8.66) | 6.45 (2.73, 9.89) | NS   |
| Manganese (Mn)                              | 14.7 (8.84, 27.1) | 11.5 (6.52, 16.9) | NS   |
| Iodine (I)                                  | 8.18 (3.59, 13.6) | 8.36 (4.84, 18.4) | NS   |

| Vitamins   |                   |                   |    |
|------------|-------------------|-------------------|----|
| Vitamin A  | 12.2 (10.2, 16.1) | 14.7 (8.95, 24.9) | NS |
| Niacin     | 46.6 (41.7, 54.0) | 42.1 (24.9, 58.1) | NS |
| Vitamin B6 | 3.26 (2.80, 5.09) | 2.61 (1.37, 3.69) | NS |
| Folate     | 27.8 (22.6, 29.9) | 25.0 (19.3, 37.1) | NS |
| Vitamin C  | 2.40 (0.85, 3.90) | 1.13 (0.23, 3.59) | NS |
| Vitamin D  | 4.72 (4.20, 6.22) | 4.12 (0.72, 8.06) | NS |
| Vitamin E  | 0.80 (0.51, 1.13) | 0.62 (0.42, 1.50) | NS |

Data from mother-infant dyads that attended follow up are presented as mean  $\pm$  SD or median (IQR) and p values are from univariate analysis (Kruskal-Wallis/Wilcoxon test for non-parametric data; ANOVA for normal data with equal variance). Dietary diversity score was calculated using nine food groups, only counting each food groups once (39, 40). Percent intake of TULs were calculated using the Institute of Medicine's TULs for minerals and vitamins for lactating women 14-18, 19-30 or 31-50 years of age (37). Iodised salt was assumed to be consumed by all mothers, as the majority of salt consumed in South Africa is iodised (61). TULs = Tolerable upper levels. <sup>1</sup>Only one mother consumed maltose. <sup>2</sup>None consumed by mothers.
